# Supplementary material for: The effect of dose on the antimalarial efficacy of artesunate-mefloquine against Plasmodium falciparum malaria: a protocol for systematic review and individual patient data (IPD) meta-analysis
Source: PubMed Central journal article supplement (PMC6609048; doi:10.1136/bmjopen-2018-027738), 2019-06-27
Supplement: bmjopen-2018-027738supp001.pdf [file bmjopen-2018-027738supp001.pdf]

# Supplementary file: The effect of dose on the antimalarial efficacy of artesunate-mefloquine against *Plasmodium falciparum* malaria: a protocol for systematic review and individual patient data (IPD) meta-analysis

Rashid Mansoor<sup>1,2</sup>, Prabin Dahal<sup>1,2</sup>, Georgina S Humphreys<sup>3</sup>, Philippe J Guerin<sup>1,2</sup>, Elizabeth A Ashley<sup>2,4</sup>, Kasia Stepniewska<sup>1,2\*</sup>

<sup>1</sup>WorldWide Antimalarial Resistance Network (WWARN), Oxford, UK

<sup>2</sup>Centre for Tropical Medicine and Global Health, Nuffield Department of Clinical Medicine, University of Oxford, Oxford, UK

<sup>3</sup>Wellcome Trust, London, UK

<sup>4</sup>Myanmar Oxford Clinical Research Unit, Yangon, Myanmar

\*Corresponding author

Dr. Kasia Stepniewska

Centre for Tropical Medicine and Global Health,  
Nuffield Department of Medicine Research Building,  
University of Oxford, Old Road Campus,  
Roosevelt Drive, Oxford OX3 7FZ

Tel: +44-01865 612900

Email : [kasia.stepniewska@wwarn.org](mailto:kasia.stepniewska@wwarn.org)

## **Literature Search Strategy**

The following search terminologies were used for searching relevant publications in the given libraries

### **PubMed via PubMed**

((("plasmodium falciparum"[MeSH Terms] OR ("plasmodium"[All Fields] AND "falciparum"[All Fields]) OR "plasmodium falciparum"[All Fields]) OR falciparum[All Fields]) OR ("malaria"[MeSH Terms] OR "malaria"[All Fields])) AND (((artunate-mefloquine[All Fields] OR artesunate/mefloquine[All Fields]) OR ASMQ[All Fields]) OR AS-MQ[All Fields]) OR AS/MQ[All Fields]) OR (("artesunate"[Supplementary Concept] OR "artesunate"[All Fields]) AND (("mefloquine"[MeSH Terms] OR "mefloquine"[All Fields]) OR MQ[All Fields]))))

### **EMBASE via OVID**

(plasmodium falciparum.mp. OR Plasmodium falciparum/ OR falciparum.mp. OR (falciparum.mp. AND (Plasmodium/ OR plasmodium.mp.)) OR malaria.mp. OR malaria/ AND (artesunatemefloquine.mp. OR ASMQ.mp. OR AS-MQ.mp. OR ((artesunate/ OR artesunate.mp.) AND (mefloquine/ OR mefloquine.mp. OR MQ.mp.))

### **BIOSIS via Web of Science**

(TS=(plasmodium falciparum) OR (TS=(falciparum AND plasmodium)) OR TS=(falciparum) OR TS=(malaria)) AND TS=(artesunate-mefloquine) OR TS=(ASMQ) OR TS=(AS-MQ) OR (TS=(artesunate) AND TS=(mefloquine OR MQ))

### **Web of Science Core Collection via Web of Science**

(TS=(plasmodium falciparum) OR (TS=(falciparum AND plasmodium)) OR TS=(falciparum) OR TS=(malaria)) AND TS=(artesunate-mefloquine) OR TS=(ASMQ) OR TS=(AS-MQ) OR (TS=(artesunate) AND TS=(mefloquine OR MQ))
